# Supplementary material for: Microsecond molecular dynamics studies of cholesterol-mediated myelin sheath degeneration in early Alzheimer's disease
Source: Royal Society of Chemistry journal article supplement (doi:10.1039/d1cp03844c), 2021-12-01
Supplement: d1cp03844c1.pdf [file d1cp03844c1.pdf]

# Supporting Information

## Microsecond Molecular Dynamics Studies of Cholesterol-Mediated Myelin Sheath Degeneration in Early Alzheimer's Disease

*Mayuri Gupta<sup>a</sup>, Donald F. Weaver<sup>\*a,b</sup>*

*<sup>a</sup>Krembil Research Institute, University Health Network, 60 Leonard Avenue, Toronto, M5T 0S8, Canada*

*<sup>b</sup>Departments of Chemistry, Medicine and Pharmaceutical Sciences, University of Toronto, Toronto, ON, Canada, M5S 3H6*

Correspondence:

D. Weaver

Krembil Research Institute

60 Leonard Avenue,

Toronto, ON, Canada, M5T 0S8

donald.weaver@uhnresearch.ca

E-mail: [dweaver@uhnres.utoronto.ca](mailto:dweaver@uhnres.utoronto.ca)

Phone: +1 416 603 5045

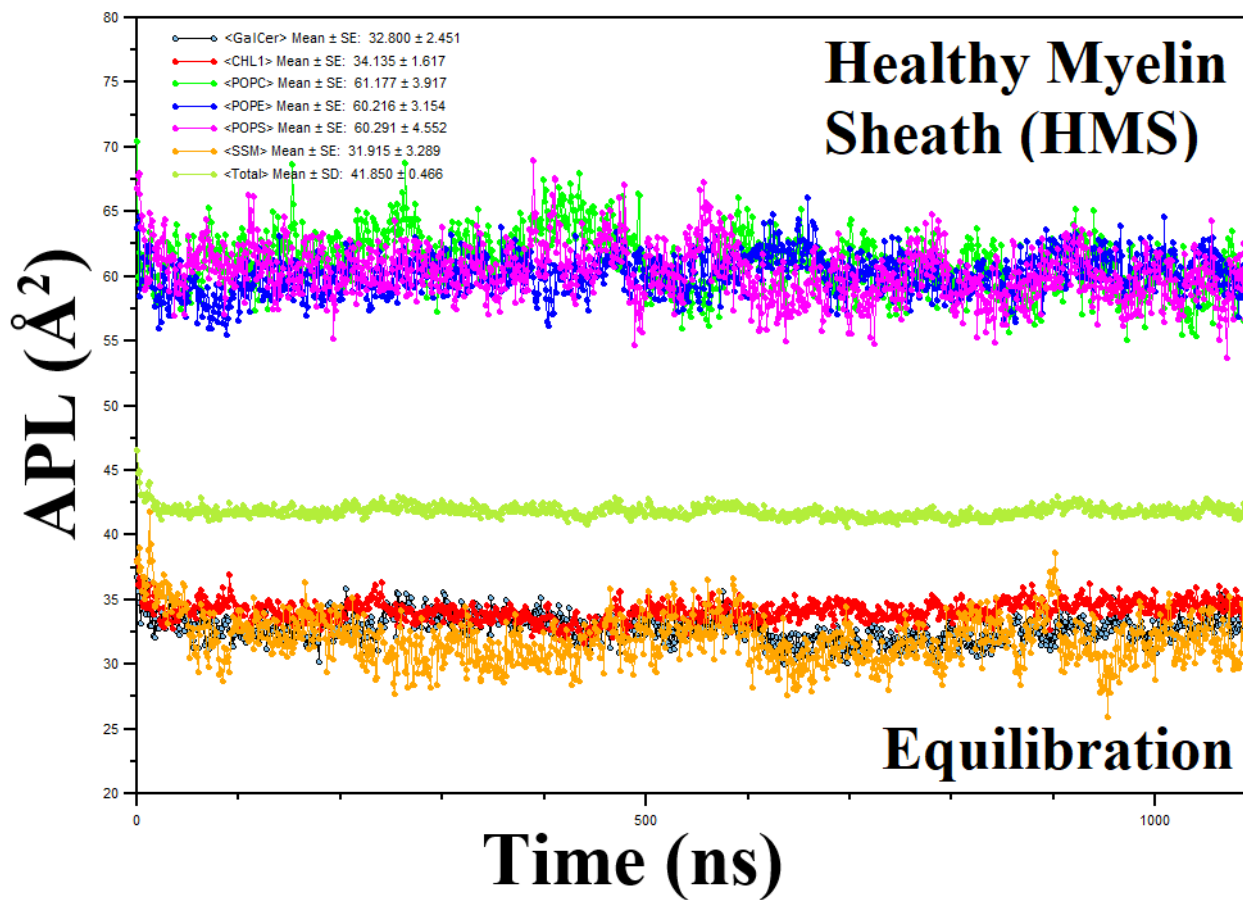

**Figure S1:** Area per lipid (APL) as a function of equilibration time for healthy myelin sheath membrane (HMS) bilayer system. The component APL ( $\text{\AA}^2$ ) of specific lipid of AP bilayer i.e GalCer, CHL, POPC, POPE, POPS and SSM, is also shown.

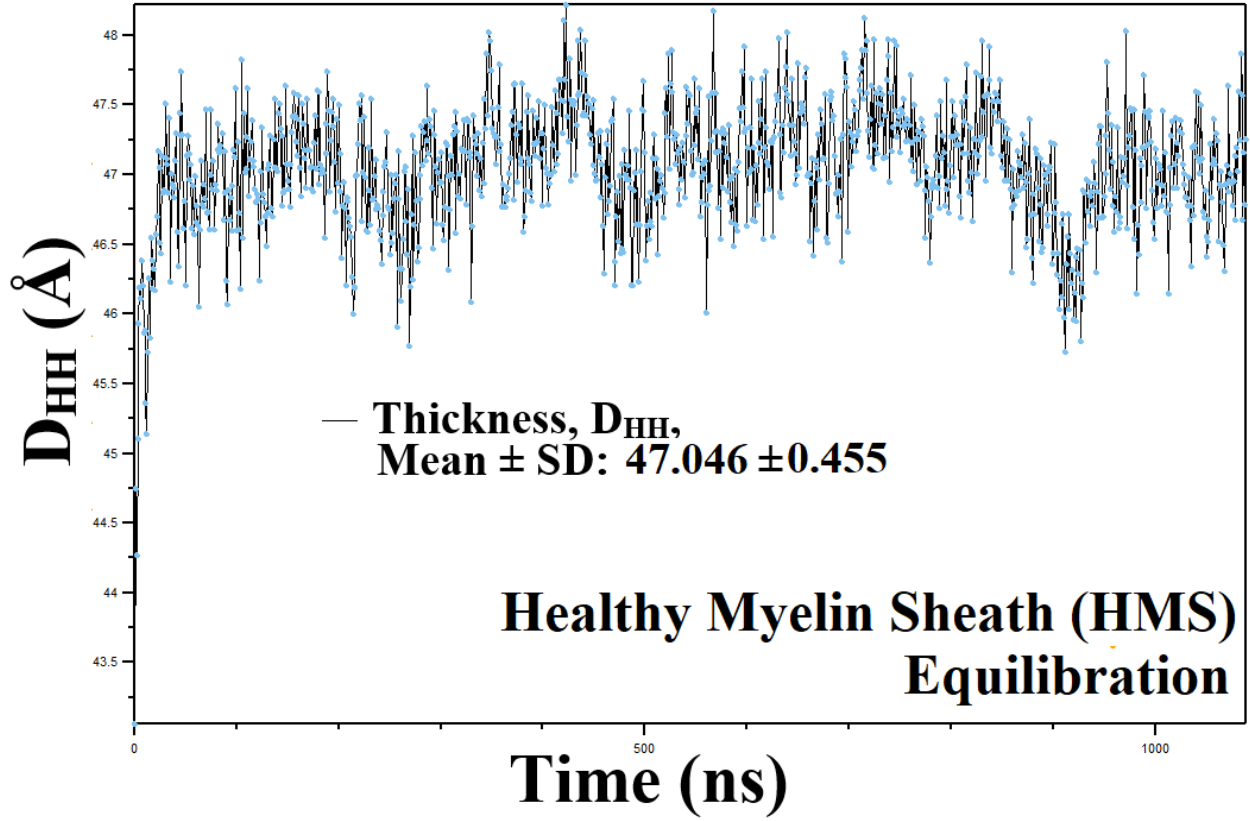

*Figure S2: Bilayer thickness ( $D_{HH}$ ) as a function of equilibration time for healthy myelin sheath membrane (HMS) bilayer system.*

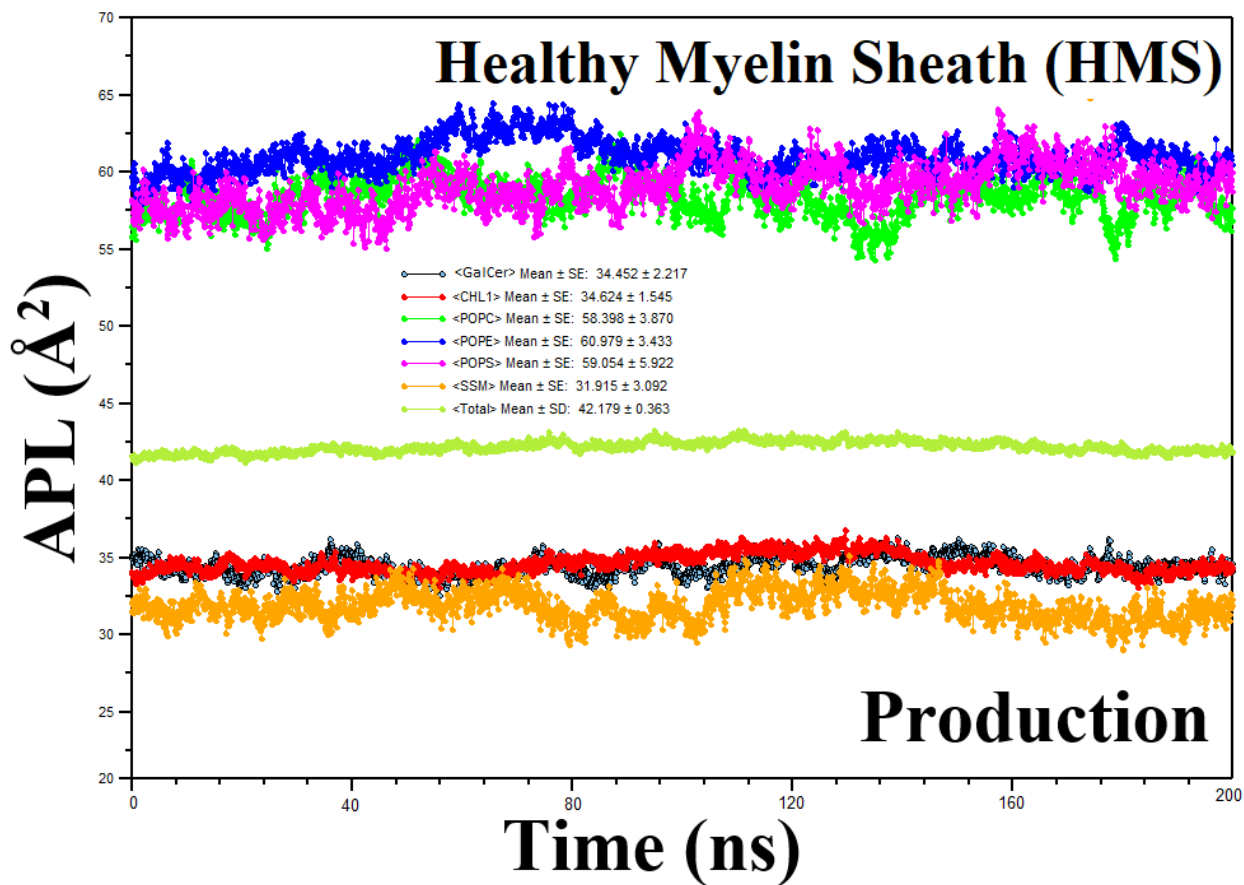

**Figure S3:** Area per lipid (APL) as a function of time for healthy myelin sheath membrane (HMS) bilayer system at production stage (after equilibration). The component APL (Å<sup>2</sup>) of specific lipid of AP bilayer i.e GalCer, CHL, POPC, POPE, POPS and SSM, is also shown.

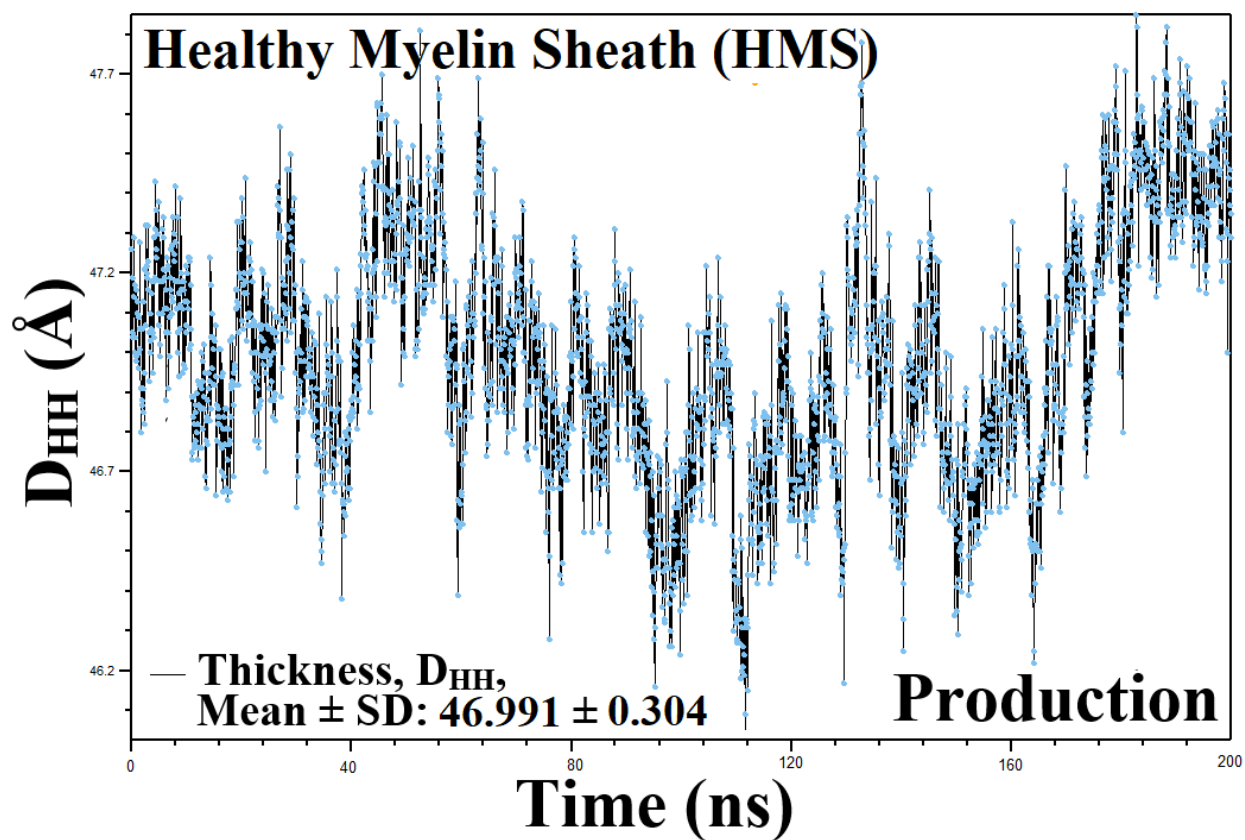

*Figure S4: Bilayer thickness ( $D_{HH}$ ) as a function of time for healthy myelin sheath membrane (HMS) bilayer system at production stage (after equilibration).*

**Table S1:** The average P-N angle for POPC, POPE, POPS, SSM lipids and average cholesterol tilt angle (C13-C10) of reference membrane systems at 310 K. The standard deviation in the results over the 0.2  $\mu$ S simulation trajectory is also given.

| S. No. | Bilayer          | $\chi_{CHL}$ | P-N angle (deg) |             |      |             | C13-C10 angle (deg) |
|--------|------------------|--------------|-----------------|-------------|------|-------------|---------------------|
|        |                  |              | POPC            | POPE        | POPS | SSM         |                     |
| 1      | PC               | 0            | 67.953+1.92     | --          | --   | --          | --                  |
| 2      | PC:PE            | 0            | 62.951+2.57     | 82.084+2.66 | --   | --          | --                  |
| 3      | PC:PE:CHL        | 0.34         | 64.206+3.21     | 79.068+3.34 | --   | --          | 14.349+0.96         |
| 4      | PC:PE:CHL:SSM    | 0.25         | 64.467+3.58     | 81.687+3.54 | --   | 67.541+3.37 | 13.427+1.12         |
| 5      | PC:PE:CHL:GalCer | 0.25         | 63.320+3.72     | 77.892+3.79 | --   | --          | 11.967+0.92         |

**Table S2:** The average fraction of contacts and mass overlap, interdigitation within lipid bilayers systems of reference membrane systems at 310 K. The standard deviation in the results over the 0.2  $\mu$ S simulation trajectory is also given.

| S.No. | Bilayer          | $\chi_{CHL}$ | Interdigitation of bilayer leaflets i.e. width of overlapping regions $W\rho$ (nm) | Fraction of mass overlap ( $I\rho$ ) | Fraction of contacts ( $I_c$ ) |
|-------|------------------|--------------|------------------------------------------------------------------------------------|--------------------------------------|--------------------------------|
| 1     | PC               | 0            | 0.520+0.050                                                                        | 0.288+0.019                          | 0.053+0.004                    |
| 2     | PC:PE            | 0            | 0.468+0.049                                                                        | 0.252+0.020                          | 0.047+0.004                    |
| 3     | PC:PE:CHL        | 0.34         | 0.323+0.044                                                                        | 0.164+0.019                          | 0.033+0.003                    |
| 4     | PC:PE:CHL:SSM    | 0.25         | 0.314+0.049                                                                        | 0.153+0.016                          | 0.031+0.003                    |
| 5     | PC:PE:CHL:GalCer | 0.25         | 0.288+0.045                                                                        | 0.153+0.018                          | 0.026+0.003                    |

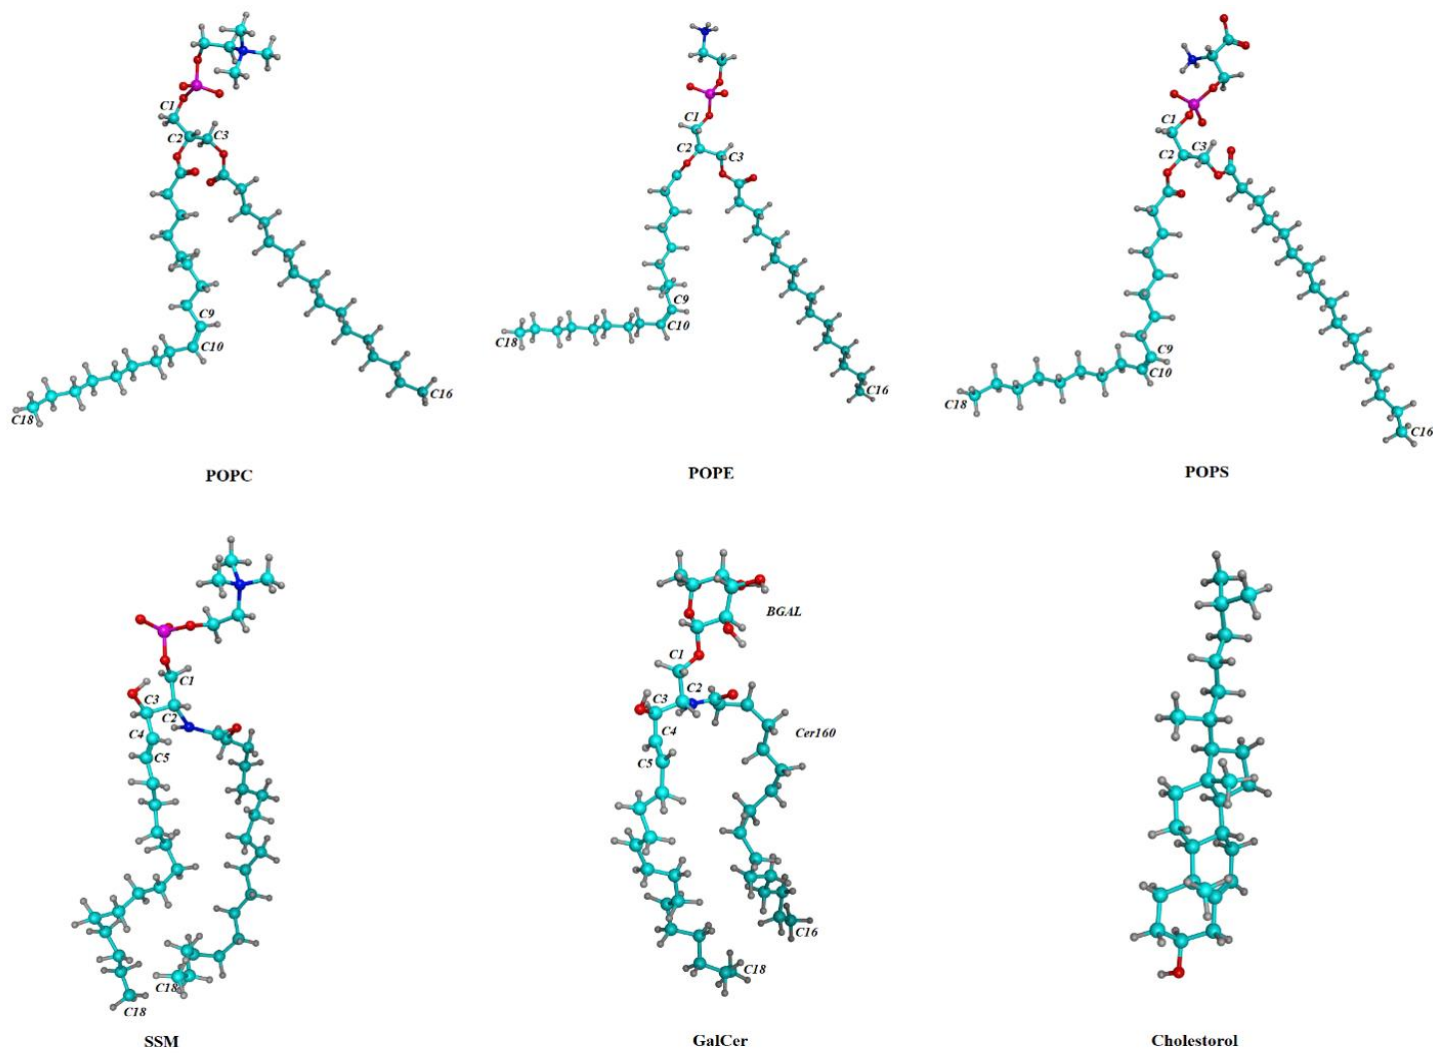

*Figure S5: Structure of various lipids and cholesterol molecules used in bilayer systems.*
